# Supplementary material
Source: Springer Nature journal article supplement (https://www.springermedizin.de/resource/supplementary/12885_2012_4021_MOESM3_ESM.pdf/9465042)

## *non-neoplastic*

relative mRNA levels TRAIL-sv/GAPDH

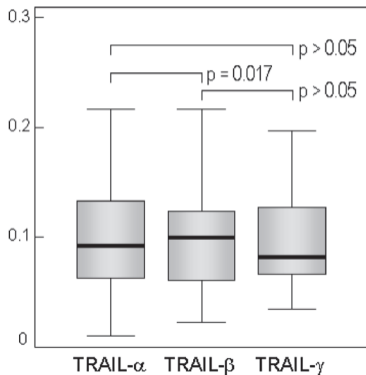

## *neoplastic*

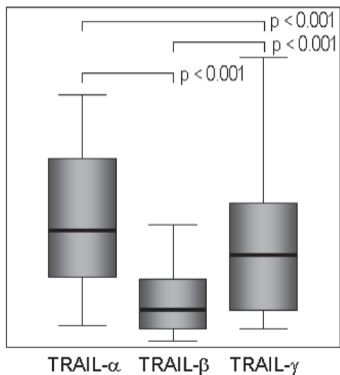

Supplement: MOESM3 [file 9465042]
